# Supplementary material for: A readily accessible ruthenium catalyst for the solvolytic dehydrogenation of amine–borane adducts
Source: Royal Society of Chemistry journal article supplement (doi:10.1039/c4dt01216j), 2014-01-01
Supplement: c4dt01216j1.pdf [file c4dt01216j1.pdf]

## A readily accessible ruthenium catalyst for the solvolytic dehydrogenation of amine–borane adducts.

M. Muñoz-Olasagasti,<sup>a</sup> A. Telleria,<sup>a</sup> J. Pérez-Miqueo,<sup>a</sup> M.A. Garralda,<sup>a</sup> and Z. Freixa<sup>a,b\*</sup>

**Fig. S1** .Solvents analysis.-----S2

**Fig.S2** Reaction profile (gas evolution) using different substrates in THF/H<sub>2</sub>O 1/3.-----S3

**Fig.S3** Reaction profile (gas evolution) using different substrates in iPrOH/H<sub>2</sub>O = 1/1.-----S4

**Fig. S4** Reaction profile in 6 successive cycles. THF/H<sub>2</sub>O = 1/3.-----S5

**Fig. S5** Reaction profile in 6 successive cycles. iPrOH/H<sub>2</sub>O 1/1.-----S5

**Fig. S6** <sup>11</sup>B-NMR spectra (160.46 MHz) at different reaction times. Reaction conditions: 0.46 mmol AB, 0.5 mol % [Ru(*p*-Cym)(bipy)Cl]Cl, 1 mL THF/H<sub>2</sub>O 3/1.-----S6

**Fig. S7** <sup>1</sup>H-NMR spectra at different reaction times, after venting the tube, and addition of more precatalyst. Reaction conditions: 0.14 mmol AB, 0.014 mmol [Ru(*p*-Cym)(bipy)Cl]Cl, 1 mL THF-*d*<sub>8</sub>/H<sub>2</sub>O 3/1, 15 °C.-----S6

**Fig. S8** <sup>11</sup>B-NMR spectra (160.46 MHz) at different reaction times. Reaction conditions: 0.14 mmol AB, 0.014 mmol [Ru(*p*-Cym)(bipy)Cl]Cl, 1 mL THF-*d*<sub>8</sub>/H<sub>2</sub>O 3/1, 15 °C.-----S7

**Fig. S9** <sup>1</sup>H-NMR spectra (D<sub>2</sub>O), aromatic region, 300MHz. Top: [Ru(*p*-Cym)(bipy)Cl]Cl + AgOTf, middle [Ru(*p*-Cym)(bipy)Cl]Cl + NaCl, bottom [Ru(*p*-Cym)(bipy)Cl]Cl. The spectrum of the complex with excess of NaCl has been recalibrated to correct the shift in the spectra produced by the addition of salt. -----S7

**Fig. S10** <sup>1</sup>H-NMR spectra, 500MHz (THF-*d*<sub>8</sub>/H<sub>2</sub>O = 3/1). [Ru(*p*-Cym)(bipy)Cl]Cl + 1 eq. AB.--S8

**Fig. S11** <sup>1</sup>H-NMR spectra, 500MHz (THF-*d*<sub>8</sub>/H<sub>2</sub>O = 3/1). Top (blue): [Ru(*p*-Cym)(bipy)Cl]Cl + AgOTf = [Ru(*p*-Cym)(bipy)(H<sub>2</sub>O)]<sup>2+</sup>. Middle (green): [Ru(*p*-Cym)(bipy)Cl]Cl + 1 eq. AB, bottom (red) [Ru(*p*-Cym)(bipy)Cl]Cl. The top spectra has been recorded and introduced here only to show that this species is not present in the reaction mixture.-----S8

**Fig S12.** <sup>1</sup>H-NMR spectra (500MHz) in THF-*d*<sub>8</sub>/H<sub>2</sub>O = 3/1. a) *In situ* NMR experiment 60 min of reaction at 15 °C. b) *In situ* NMR experiment after venting the tube. c) Ru(*p*-Cym)(bipy)Cl]Cl. d) Ru(*p*-Cym)(bipy)Cl]Cl + excess of AgOTf.-----S9

**Fig.S13** ORTEP representation of [NMe<sub>2</sub>BH<sub>2</sub>]<sub>2</sub>. Ellipsoids at 50% of probability.-----S9

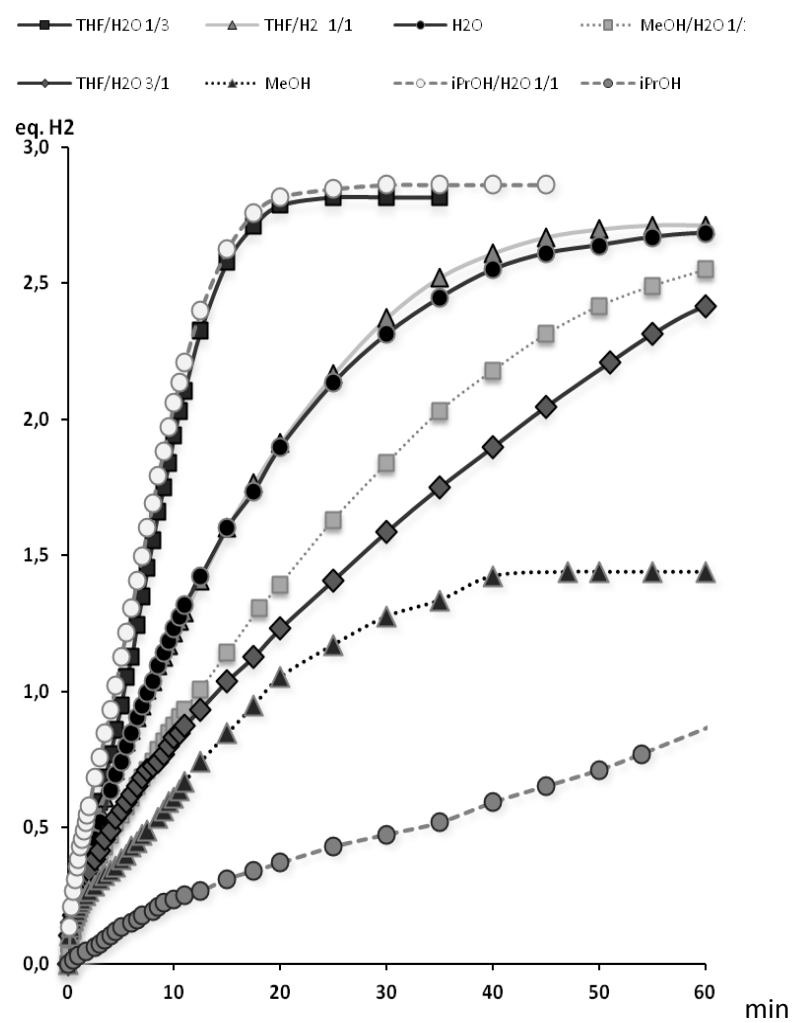

**Fig. S1** .Solvents analysis. Reaction conditions: 1.38 mmol AB, 0.5 mol % [Ru(*p*-Cym)(bipy)Cl]Cl, 3 mL solvent, rt.

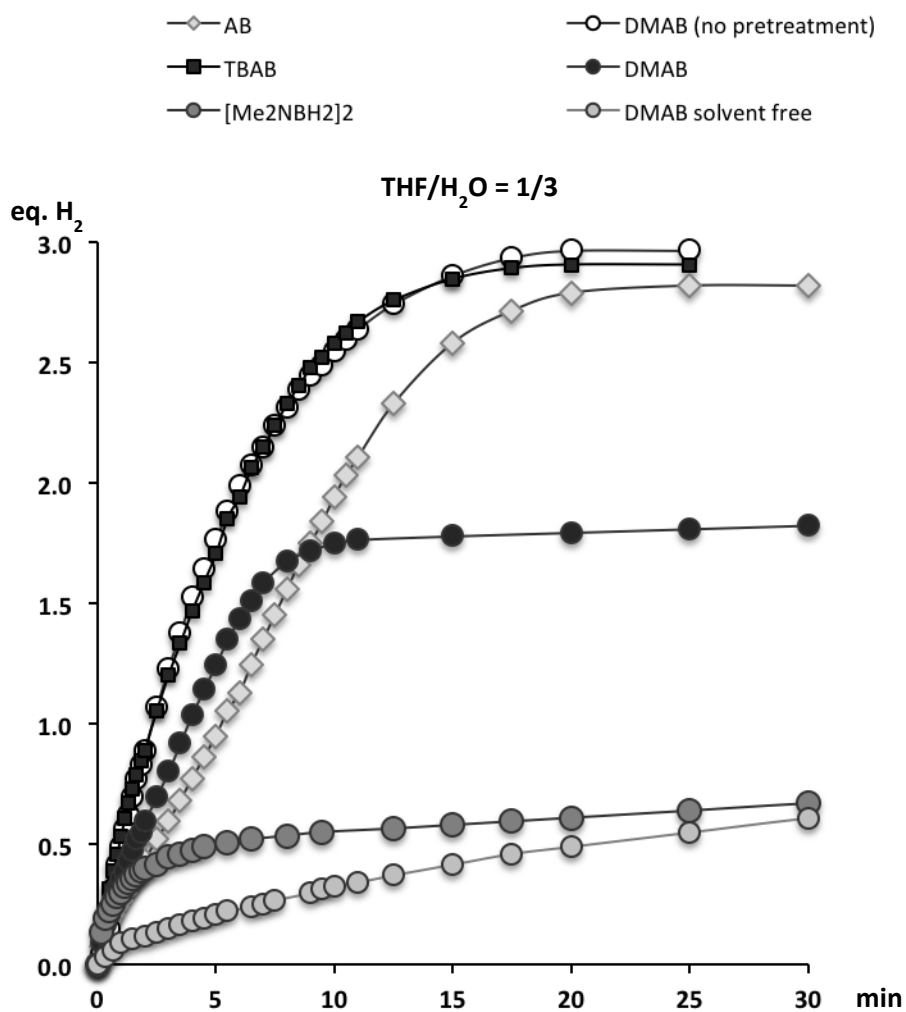

**Fig.S2** Reaction profile (gas evolution) using different substrates in THF/H<sub>2</sub>O 1/3. Unreactive substrates (TEAB and TMAB have not been represented since no gas evolution was detected).

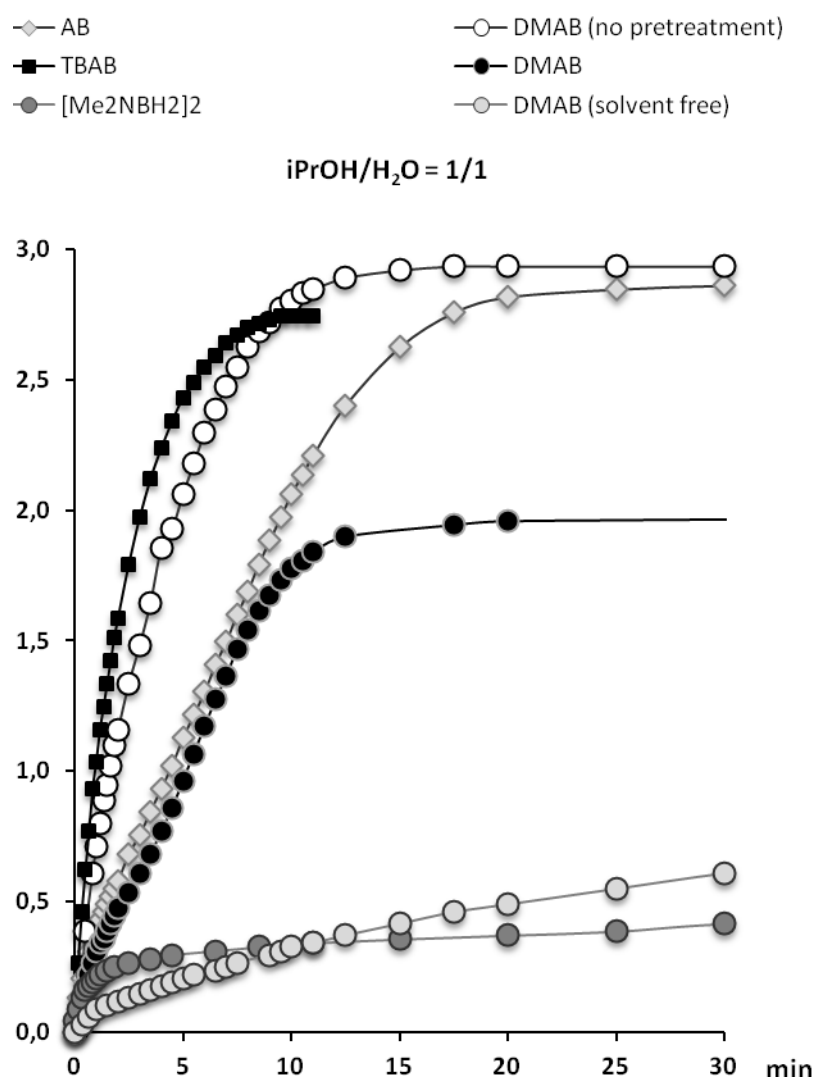

**Fig.S3** Reaction profile (gas evolution) using different substrates in iPrOH/H<sub>2</sub>O = 1/1. Unreactive substrates (TEAB and TMAB have not been represented since no gas evolution was detected).

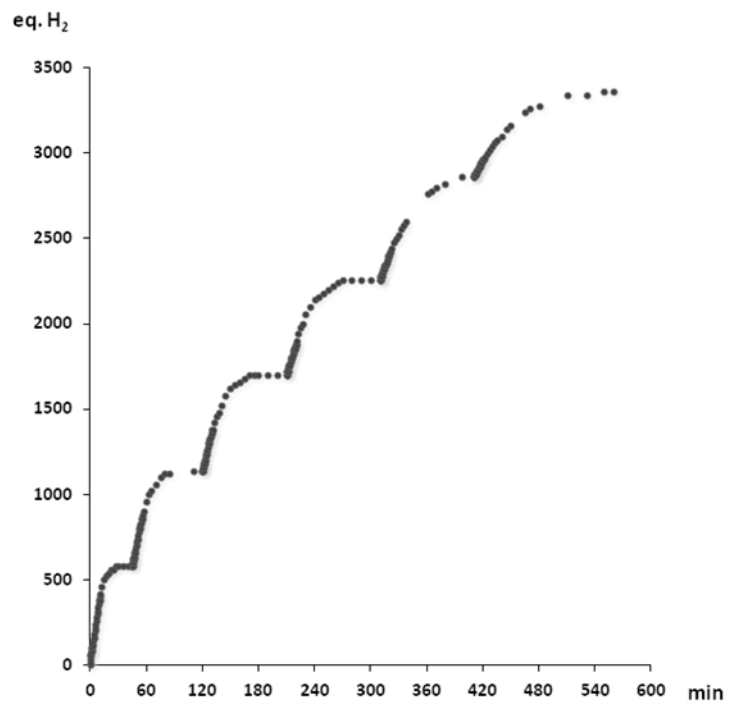

**Fig. S4** Reaction profile (equivalents of H<sub>2</sub> evolved per mole of Ru vs time) in 6 successive cycles. Reaction conditions (first cycle): 1.38 mmol AB, 0.5 mol % [Ru(*p*-Cym)(bipy)Cl]Cl, 3 mL THF/H<sub>2</sub>O 1/3, rt. Successive additions of 1.38 mmol AB in 0.5 mL of THF/H<sub>2</sub>O 1/3.

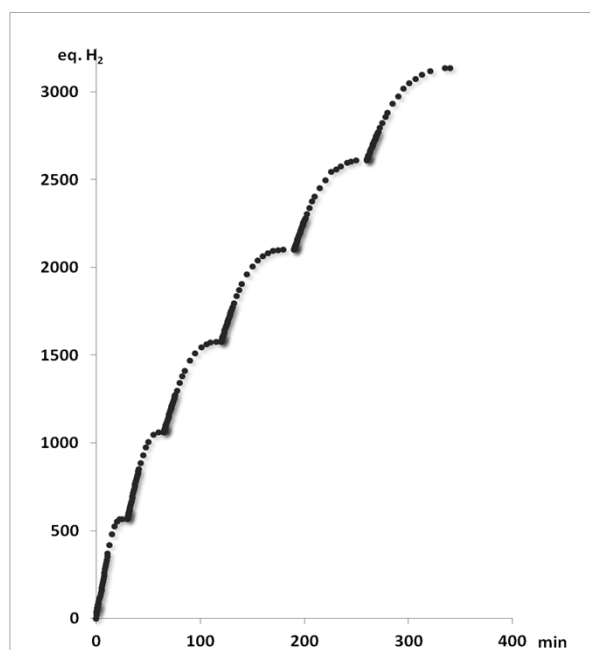

**Fig. S5** Reaction profile (equivalents of H<sub>2</sub> per mole of Ru evolved vs time) in 6 successive cycles. Reaction conditions (first cycle): 1.38 mmol AB, 0.5 mol % [Ru(*p*-Cym)(bipy)Cl]Cl, 3 mL iPrOH/H<sub>2</sub>O 1/1, rt. Successive additions of 1.38 mmol AB in 0.5 mL of THF/H<sub>2</sub>O 1/3.

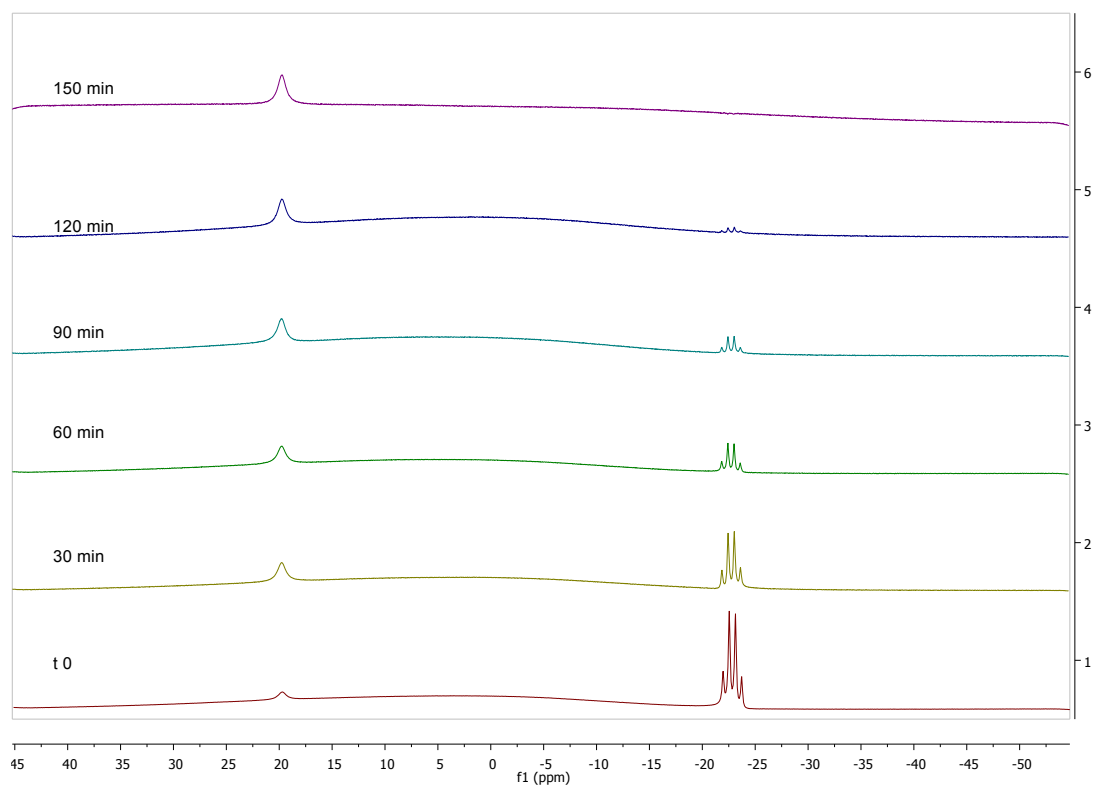

**Fig. S6**  $^{11}\text{B}$ -NMR spectra (160.46 MHz) at different reaction times. Reaction conditions: 0.46 mmol AB, 0.5 mol %  $[\text{Ru}(p\text{-Cym})(\text{bipy})\text{Cl}]\text{Cl}$ , 1 mL THF/ $\text{H}_2\text{O}$  3/1, internal  $\text{D}_2\text{O}$  capillary, rt.

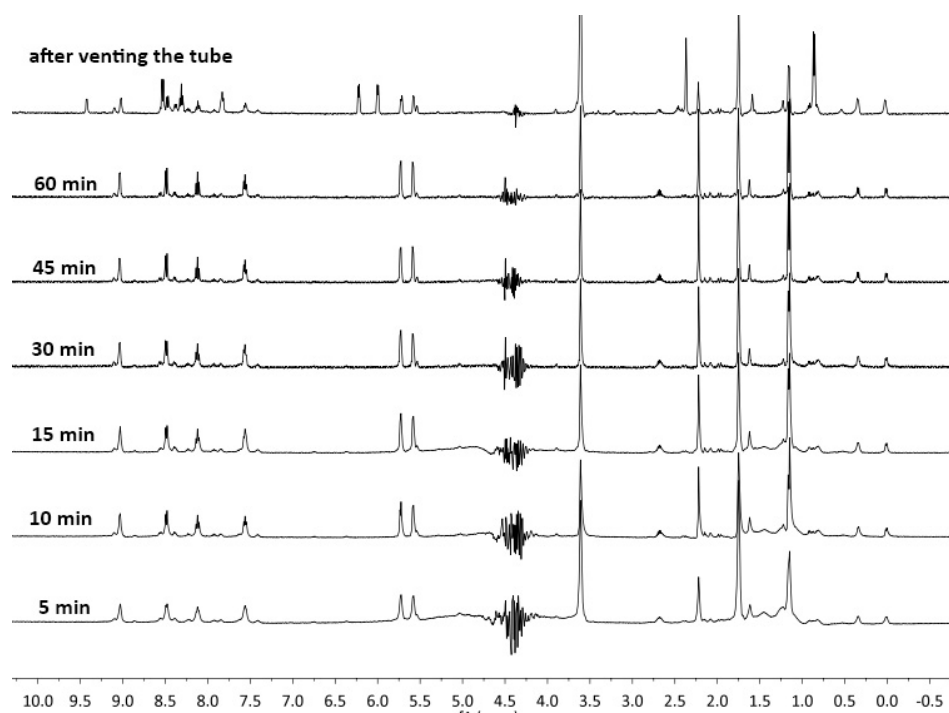

**Fig. S7**  $^1\text{H}$ -NMR spectra at different reaction times, and after venting the tube. Reaction conditions: 0.14 mmol AB, 0.014 mmol  $[\text{Ru}(p\text{-Cym})(\text{bipy})\text{Cl}]\text{Cl}$ , 1 mL THF- $d_8$ / $\text{H}_2\text{O}$  3/1, 15  $^\circ\text{C}$ .

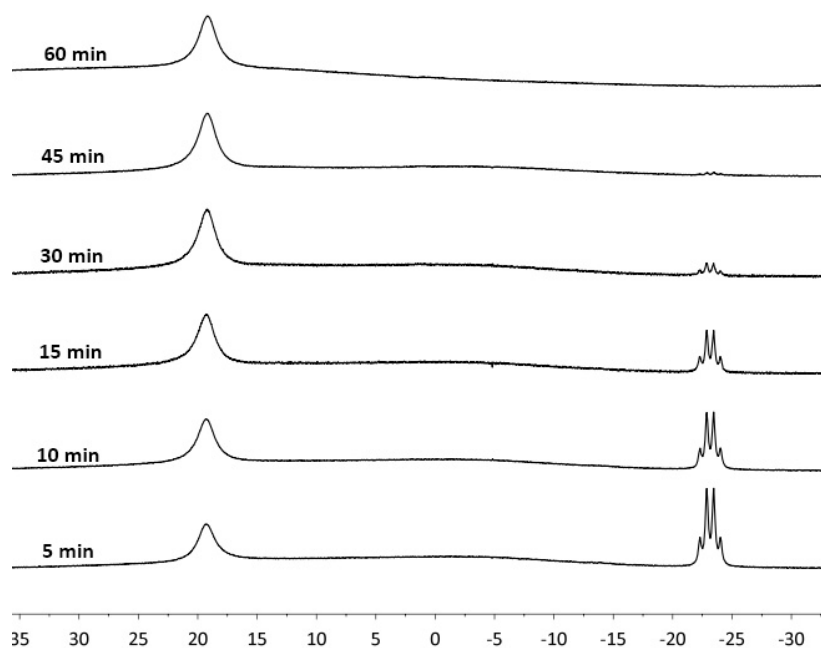

**Fig. S8**  $^{11}\text{B}$ -NMR spectra (160.46 MHz) at different reaction times. Reaction conditions: 0.14 mmol AB, 0.014 mmol  $[\text{Ru}(p\text{-Cym})(\text{bipy})\text{Cl}]\text{Cl}$ , 1 mL  $\text{THF-}d_8/\text{H}_2\text{O}$  3/1, 15 °C.

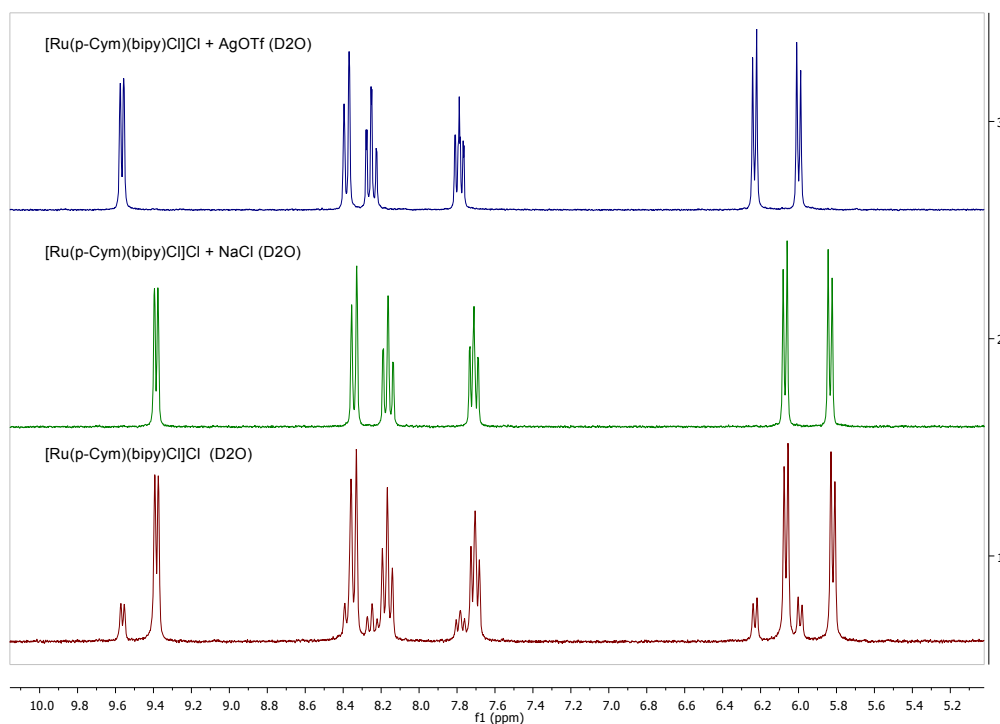

**Fig. S9**  $^1\text{H}$ -NMR spectra ( $\text{D}_2\text{O}$ ), aromatic region, 300MHz. Top:  $[\text{Ru}(p\text{-Cym})(\text{bipy})\text{Cl}]\text{Cl} + \text{AgOTf}$ , middle  $[\text{Ru}(p\text{-Cym})(\text{bipy})\text{Cl}]\text{Cl} + \text{NaCl}$ , bottom  $[\text{Ru}(p\text{-Cym})(\text{bipy})\text{Cl}]\text{Cl}$ . The spectrum of the complex with excess of NaCl has been recalibrated to correct the shift in the spectra produced by the addition of salt.

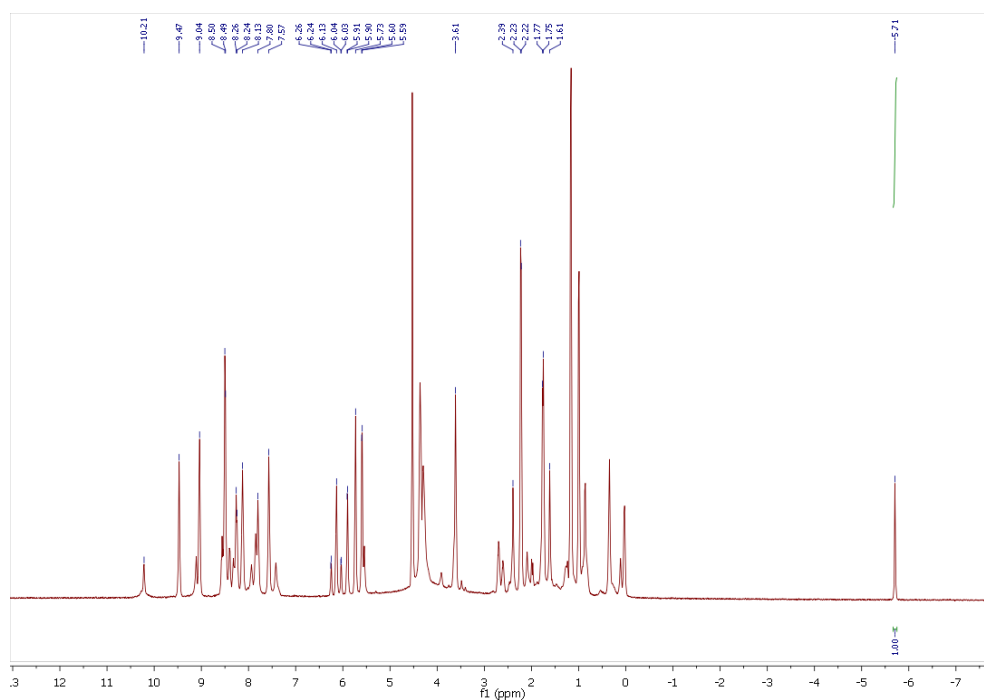

**Fig. S10**  $^1\text{H-NMR}$  spectra, 500MHz (THF- $d_8$ /H $_2$ O = 3/1).  $[\text{Ru}(p\text{-Cym})(\text{bipy})\text{Cl}]\text{Cl} + 1 \text{ eq. AB}$ .

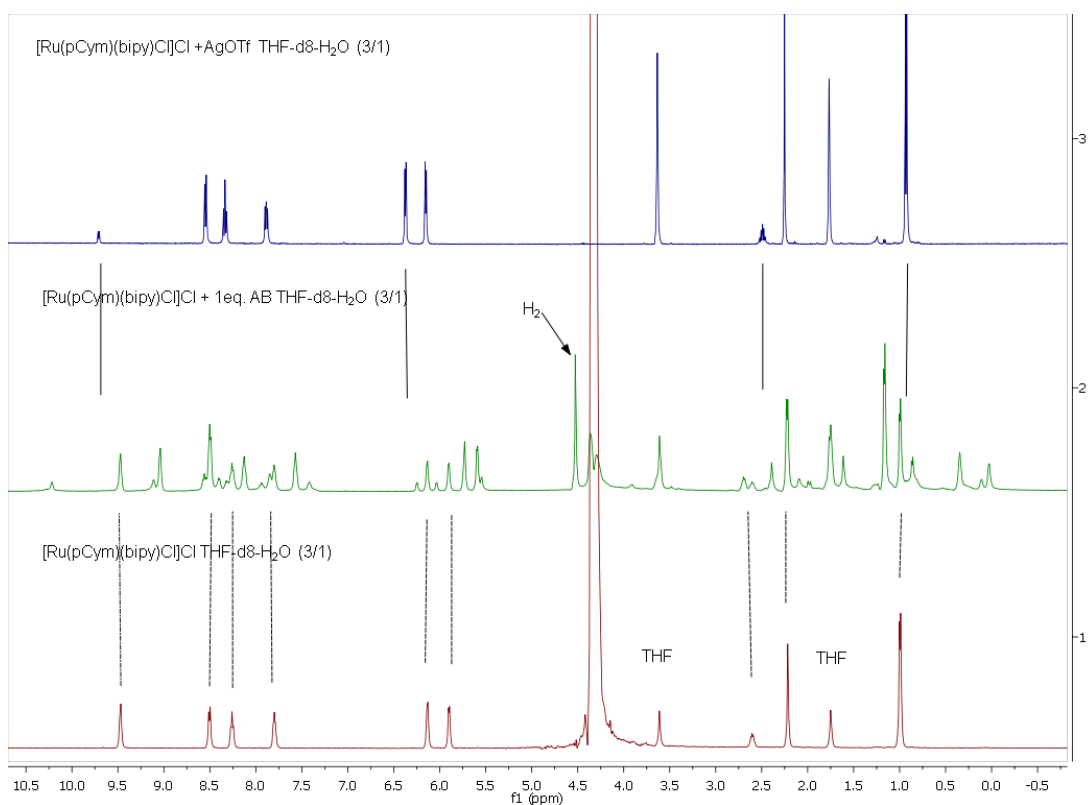

**Fig. S11**  $^1\text{H-NMR}$  spectra, 500MHz (THF- $d_8$ /H $_2$ O = 3/1). Top (blue):  $[\text{Ru}(p\text{-Cym})(\text{bipy})\text{Cl}]\text{Cl} + \text{AgOTf} = [\text{Ru}(p\text{-Cym})(\text{bipy})(\text{H}_2\text{O})]^{2+}$ . Middle (green):  $[\text{Ru}(p\text{-Cym})(\text{bipy})\text{Cl}]\text{Cl} + 1 \text{ eq. AB}$ , bottom (red)  $[\text{Ru}(p\text{-Cym})(\text{bipy})\text{Cl}]\text{Cl}$ . The top spectra has been recorded and introduced here only to show that this species is not present in the reaction mixture.



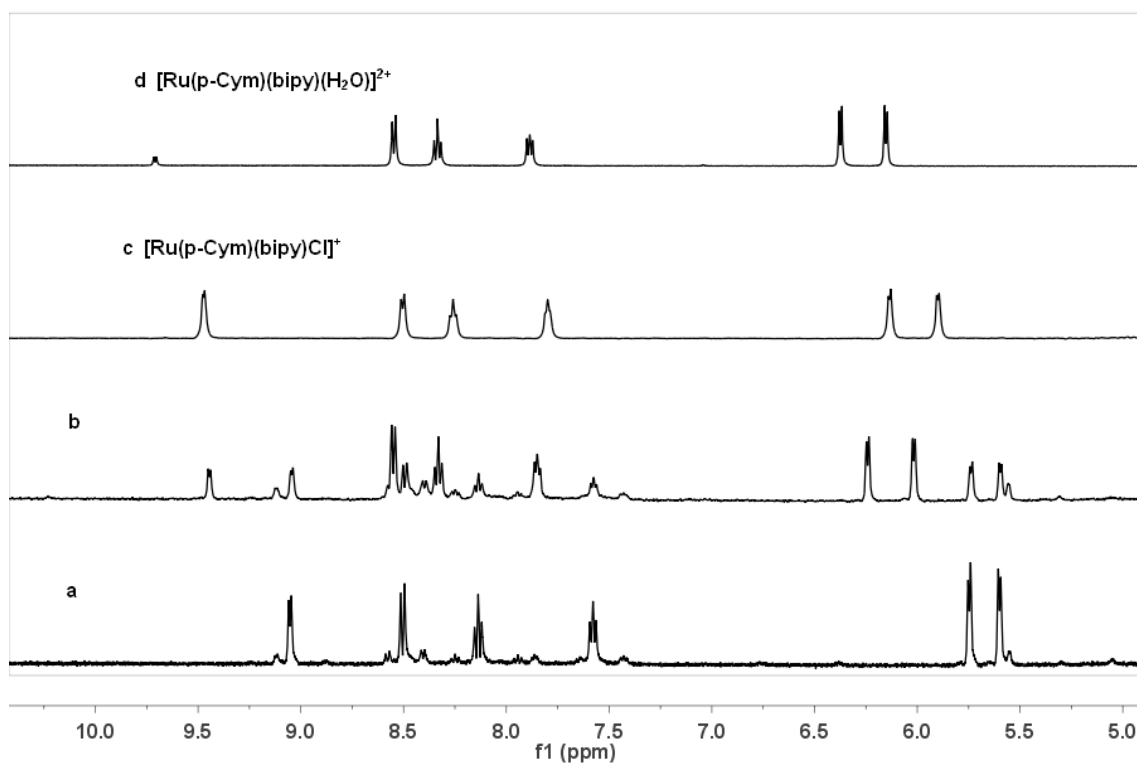

**Fig S12.**  $^1\text{H}$ -NMR spectra (500MHz) in  $\text{THF-d}_8/\text{H}_2\text{O} = 3/1$ . a) *In situ* NMR experiment 60 min of reaction at  $15\text{ }^\circ\text{C}$ . b) *In situ* NMR experiment after venting the tube. c)  $\text{Ru}(\text{p-Cym})(\text{bipy})\text{Cl}]\text{Cl}$ . d)  $\text{Ru}(\text{p-Cym})(\text{bipy})\text{Cl}]\text{Cl}$  + excess of  $\text{AgOTf}$  (in this spectra the intensity of the signal of the bipyridine at 9.7 ppm presents low intensity due to an artifact caused by the solvent suppression sequence used to acquire this spectra).

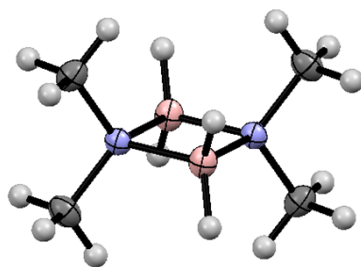

**Fig.S13** ORTEP representation of  $[\text{NMe}_2\text{BH}_2]_2$ . Ellipsoids at 50% of probability.

Crystallographic data:

Table S1 - Crystal Data and Details of the Structure Determination  
for: a2014197\_martin1 R = 0.04

Table S2 - Final Coordinates and Equivalent Isotropic Displacement  
Parameters of the non-Hydrogen atoms  
for: a2014197\_martin1 R = 0.04

Table S3 - Hydrogen Atom Positions and Isotropic Displacement

## Supporting Information

Parameters  
for: a2014197\_martin1 R = 0.04

Table S4 - (An)isotropic Displacement Parameters  
for: a2014197\_martin1 R = 0.04

Table S5 - Bond Distances (Angstrom)  
for: a2014197\_martin1 R = 0.04

Table S6 - Bond Angles (Degrees)  
for: a2014197\_martin1 R = 0.04

Table S7 - Torsion Angles (Degrees)  
for: a2014197\_martin1 R = 0.04

Table S8 - Contact Distances(Angstrom)  
for: a2014197\_martin1 R = 0.04

Table S1 - Crystal Data and Details of the Structure Determination  
for: a2014197\_martin1 R = 0.04

### Crystal Data

|                          |                                  |
|--------------------------|----------------------------------|
| Formula                  | C4 H16 B2 N2                     |
| Formula Weight           | 113.81                           |
| Crystal System           | Triclinic                        |
| Space group              | P-1 (No. 2)                      |
| a, b, c [Angstrom]       | 5.8241(12) 6.0130(13) 6.2338(13) |
| alpha, beta, gamma [deg] | 80.299(18) 81.535(17) 65.94(2)   |
| V [Ang**3]               | 195.74(8)                        |
| Z                        | 1                                |
| D(calc) [g/cm**3]        | 0.965                            |
| Mu(CuKa) [/mm]           | 0.408                            |
| F(000)                   | 64                               |
| Crystal Size [mm]        | 0.00 x 0.00 x 0.00               |

### Data Collection

|                      |                       |
|----------------------|-----------------------|
| Temperature (K)      | 100                   |
| Radiation [Angstrom] | CuKa 1.54184          |
| Theta Min-Max [Deg]  | 7.2, 62.4             |
| Dataset              | -5: 6 ; -6: 6 ; -7: 7 |

|                                                                                  |                      |
|----------------------------------------------------------------------------------|----------------------|
| Tot., Uniq. Data, R(int)                                                         | 969, 619, 0.027      |
| Observed data [ $I > 2.0 \sigma(I)$ ]                                            | 513                  |
| Refinement                                                                       |                      |
| Nref, Npar                                                                       | 619, 47              |
| R, wR2, S                                                                        | 0.0387, 0.0905, 1.09 |
| $w = 1/[\sigma^2(F_o^2) + (0.0341P)^2 + 0.0338P]$ where $P = (F_o^2 + 2F_c^2)/3$ |                      |
| Max. and Av. Shift/Error                                                         | 0.00, 0.00           |
| Min. and Max. Resd. Dens. [ $e/\text{Ang}^3$ ]                                   | -0.14, 0.13          |

Table S2 - Final Coordinates and Equivalent Isotropic Displacement  
Parameters of the non-Hydrogen atoms  
for: a2014197\_martin1 R = 0.04

| Atom | x         | y         | z            | U(eq) [ $\text{Ang}^2$ ] |
|------|-----------|-----------|--------------|--------------------------|
| ---- | ---       | ---       | ---          | -----                    |
| N1   | 0.4753(2) | 0.1413(2) | -0.15659(19) | 0.0199(4)                |
| C1   | 0.6823(3) | 0.1647(3) | -0.3128(2)   | 0.0287(5)                |
| C2   | 0.2326(3) | 0.3265(3) | -0.2279(2)   | 0.0270(5)                |
| B1   | 0.5140(3) | 0.1324(3) | 0.0947(3)    | 0.0238(5)                |

U(eq) = 1/3 of the trace of the orthogonalized U Tensor

Table S3 - Hydrogen Atom Positions and Isotropic Displacement  
Parameters  
for: a2014197\_martin1 R = 0.04

| Atom | x        | y        | z        | U(iso) [ $\text{Ang}^2$ ] |
|------|----------|----------|----------|---------------------------|
| ---- | ---      | ---      | ---      | -----                     |
| H1A  | 0.65970  | 0.13930  | -0.45820 | 0.0430                    |
| H1B  | 0.84400  | 0.04140  | -0.26580 | 0.0430                    |
| H1C  | 0.68110  | 0.32910  | -0.31820 | 0.0430                    |
| H1D  | 0.694(3) | 0.137(3) | 0.113(3) | 0.025(4)                  |
| H1E  | 0.344(3) | 0.267(3) | 0.177(3) | 0.026(4)                  |
| H2A  | 0.22940  | 0.49100  | -0.22960 | 0.0400                    |
| H2B  | 0.09420  | 0.30810  | -0.12660 | 0.0400                    |

## Supporting Information

H2C    0.21270    0.30350    -0.37510    0.0400

=====

The Temperature Factor has the Form of  $\text{Exp}(-T)$  Where  
 $T = 8 * (\text{Pi} ** 2) * U * (\text{Sin}(\text{Theta}) / \text{Lambda}) ** 2$  for Isotropic Atoms

Table S4 - (An)isotropic Displacement Parameters  
 for: a2014197\_martin1    R = 0.04

| Atom | U(1,1) or U | U(2,2)    | U(3,3)    | U(2,3)     | U(1,3)     | U(1,2)     |
|------|-------------|-----------|-----------|------------|------------|------------|
| N1   | 0.0235(7)   | 0.0207(6) | 0.0162(6) | -0.0038(4) | -0.0020(5) | -0.0086(5) |
| C1   | 0.0319(9)   | 0.0348(8) | 0.0236(8) | -0.0070(6) | 0.0016(6)  | -0.0173(7) |
| C2   | 0.0309(9)   | 0.0231(8) | 0.0259(8) | -0.0044(6) | -0.0074(6) | -0.0074(7) |
| B1   | 0.0336(10)  | 0.0220(9) | 0.0179(9) | -0.0041(6) | -0.0053(7) | -0.0115(7) |

=====

The Temperature Factor has the Form of  $\text{Exp}(-T)$  Where  
 $T = 8 * (\text{Pi} ** 2) * U * (\text{Sin}(\text{Theta}) / \text{Lambda}) ** 2$  for Isotropic Atoms  
 $T = 2 * (\text{Pi} ** 2) * \text{Sum}_{ij} (h(i) * h(j) * U(i,j) * \text{Astar}(i) * \text{Astar}(j))$ , for  
 Anisotropic Atoms. Astar(i) are Reciprocal Axial Lengths and  
 h(i) are the Reflection Indices.

Table S5 - Bond Distances (Angstrom)  
 for: a2014197\_martin1    R = 0.04

|    |       |          |    |      |           |
|----|-------|----------|----|------|-----------|
| N1 | -C1   | 1.472(2) | C1 | -H1C | 0.9800    |
| N1 | -C2   | 1.473(2) | C2 | -H2A | 0.9800    |
| N1 | -B1   | 1.604(2) | C2 | -H2B | 0.9800    |
| N1 | -B1_a | 1.603(2) | C2 | -H2C | 0.9800    |
| C1 | -H1A  | 0.9800   | B1 | -H1D | 1.083(19) |
| C1 | -H1B  | 0.9800   | B1 | -H1E | 1.112(18) |

Table S6 - Bond Angles (Degrees)  
 for: a2014197\_martin1    R = 0.04

|    |     |       |            |     |     |      |        |
|----|-----|-------|------------|-----|-----|------|--------|
| C1 | -N1 | -C2   | 109.32(11) | N1  | -C2 | -H2A | 109.00 |
| C1 | -N1 | -B1   | 114.59(12) | H2A | -C2 | -H2B | 109.00 |
| C1 | -N1 | -B1_a | 115.03(12) | N1  | -C2 | -H2B | 109.00 |

Supporting Information

|     |     |       |            |      |     |       |           |
|-----|-----|-------|------------|------|-----|-------|-----------|
| C2  | -N1 | -B1   | 114.61(11) | N1   | -C2 | -H2C  | 109.00    |
| C2  | -N1 | -B1_a | 115.16(13) | H2A  | -C2 | -H2C  | 109.00    |
| B1  | -N1 | -B1_a | 86.81(11)  | H2B  | -C2 | -H2C  | 109.00    |
| N1  | -C1 | -H1C  | 109.00     | N1   | -B1 | -N1_a | 93.19(11) |
| N1  | -C1 | -H1A  | 109.00     | N1   | -B1 | -H1D  | 111.8(10) |
| N1  | -C1 | -H1B  | 109.00     | N1   | -B1 | -H1E  | 110.7(10) |
| H1B | -C1 | -H1C  | 109.00     | H1D  | -B1 | -H1E  | 116.8(13) |
| H1A | -C1 | -H1B  | 110.00     | N1_a | -B1 | -H1D  | 110.5(9)  |
| H1A | -C1 | -H1C  | 109.00     | N1_a | -B1 | -H1E  | 111.5(9)  |

Table S7 - Torsion Angles (Degrees)  
for: a2014197\_martin1 R = 0.04

|      |       |     |       |             |
|------|-------|-----|-------|-------------|
| C1   | -N1   | -B1 | -N1_a | -116.13(13) |
| C2   | -N1   | -B1 | -N1_a | 116.29(13)  |
| B1_a | -N1   | -B1 | -N1_a | 0.00(11)    |
| C1_a | -N1_a | -B1 | -N1   | -115.72(13) |
| C2_a | -N1_a | -B1 | -N1   | 115.76(12)  |
| B1_a | -N1_a | -B1 | -N1   | 0.00(10)    |

Table S8 - Contact Distances(Angstrom)  
for: a2014197\_martin1 R = 0.04

|     |        |        |     |        |        |
|-----|--------|--------|-----|--------|--------|
| H1A | .H2C   | 2.3900 | H1E | .H2B   | 2.4700 |
| H1B | .H1D   | 2.4700 | H1E | .H1B_a | 2.4600 |
| H1B | .H1E_a | 2.4600 | H2A | .H1C   | 2.4200 |
| H1C | .H2A   | 2.4200 | H2B | .H1E   | 2.4700 |
| H1D | .H1B   | 2.4700 | H2B | .H1D_a | 2.4400 |
| H1D | .H2B_a | 2.4400 | H2C | .H1A   | 2.3900 |

Translation of Symmetry Code to Equiv.Pos

## Supporting Information

a = [ 2655.00] = [ 2\_655] = 1-x,-y,-z
